# Supplementary material
Source: Springer Nature journal article supplement (https://www.springermedizin.de/resource/supplementary/12943_2009_565_MOESM9_ESM.pdf/9554982)

## (A) PCR with ChIP-ed DNA

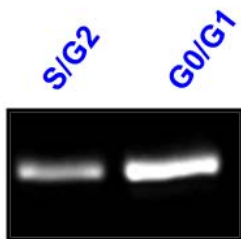

## (B) Quantitative ChIP analysis

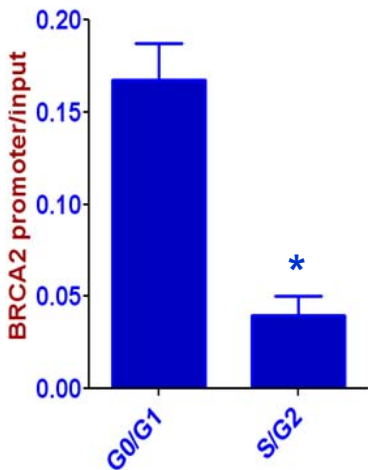

Supplement: MOESM9 [file 9554982]
